## TECHNICAL EDITOR'S PAGE

The JOURNAL OF PRESSURE VESSEL TECHNOLOGY is broadening its sponsorship and scope starting with the November 1976 issue. The Journal will now be sponsored by both the Pressure Vessels and Piping Division and the Petroleum Division. The Journal will continue to cover the Pressure Vessels and Piping disciplines in the nuclear, chemical, petroleum and other industries in terms of:

- Design
- Analysis
- Computer Technology
- Operations
- Applications
- Components
- High Pressure Technology
- Materials
- Fabrication
- Codes and Standards
- Research

In addition, the Journal will cover the discipline of Petroleum Engineering in the areas of:

- Hydrocarbon Processes
- Petrochemicals
- Refining
- Gas Products
- Drilling
- Production
- Research
- Mining
- Completion and Stimulation Service
- Rock Mechanics
- Offshore Technology
- Advanced Equipment Manufacturing
- Cost Reduction

- Materials Selection
- Materials Use
- Materials in Design
- Materials and Operation
- Transportation—Oil Gas and Products
- Pipelines
- Coal Slurry
- Transportation Equipment
- Storage
- Computer Controls

In this issue of the Journal a major portion of the current Long-Range Plan for Pressure Vessel Research that was assembled by the Pressure Vessel Research Committee is reproduced. The Pressure Vessel Research Committee invites comments and suggestions on these research problems from other groups concerned with pressure vessel research. Please address such comments to our Associate Editor:

Mr. C. R. Felmley, Jr.  
Welding Research Council  
345 East 47th Street  
New York, New York 10017

There are three articles in the Pressure Vessel and Piping Codes section of this issue of the Journal that relate to various aspects of the ASME Boiler and Pressure Vessel Code rules for elevated temperature design. These articles, although written by authors who are closely involved in the development of Code rules, are the opinions of the authors and do not represent official Code information. Also appearing in the Pressure Vessel and Piping Codes section is an educational article on Section VIII, Division 1 of the ASME Boiler and Pressure Vessel Code. Your comments on the contents or desirability of such articles are requested.

**IRWIN BERMAN**
